# Supplementary material
Source: MDPI journal article supplement (doi:10.3390/cleantechnol8030095)
Supplement: s1 [file Table S1. Reference flow inventory AWS_GCS_CD.pdf › Table S1. Reference flow inventory AWS_GCS_CD.pdf]

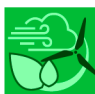

Table S1. Reference flow inventory AWS\_GCS\_CD.

|    | Artificial lightweight aggregates {ES}   production   Cut-off, U | Aggregate washing sludge, treated {ES}   market for   Cut-off, U | Granite cutting sludge, treated {ES}   market for   Cut-off, U | Cork dust, post-process {ES}   collection of   Cut-off, U | Tap water (Europe without Switzerland)   market for tap water   Cut-off, U | Electricity, medium voltage {ES}   market for   Cut-off, U | Heat, district or industrial, other than natural gas {Europe without Switzerland}   market for heat, district or industrial, other than natural gas   Cut-off, U | Containerboard, linerboard {RER}   market for containerboard, linerboard   Cut-off, U | Packaging film, low density polyethylene {GLO}   market for packaging film, low density polyethylene   Cut-off, U | Water (emissions air) | Water (emissions water) | Biogenic carbon dioxide (emissions air) |
|----|------------------------------------------------------------------|------------------------------------------------------------------|----------------------------------------------------------------|-----------------------------------------------------------|----------------------------------------------------------------------------|------------------------------------------------------------|------------------------------------------------------------------------------------------------------------------------------------------------------------------|---------------------------------------------------------------------------------------|-------------------------------------------------------------------------------------------------------------------|-----------------------|-------------------------|-----------------------------------------|
|    | 1 m <sup>3</sup>                                                 | kg                                                               | kg                                                             | kg                                                        | m <sup>3</sup>                                                             | kWh                                                        | MJ                                                                                                                                                               | kg                                                                                    | kg                                                                                                                | m <sup>3</sup>        | m <sup>3</sup>          | kg                                      |
| 16 | 01-AWS_GCS_CD                                                    | 856.97                                                           | 0.00                                                           | 0.00                                                      | 0.03                                                                       | 19.48                                                      | 2397.29                                                                                                                                                          | 0.76                                                                                  | 0.18                                                                                                              | 0.14                  | 0.14                    | 0.00                                    |
| 17 | 02-AWS_GCS_CD                                                    | 435.01                                                           | 0.00                                                           | 6.62                                                      | 0.02                                                                       | 10.04                                                      | 1209.58                                                                                                                                                          | 0.76                                                                                  | 0.18                                                                                                              | 0.07                  | 0.07                    | 6.62                                    |
| 18 | 03-AWS_GCS_CD                                                    | 626.15                                                           | 0.00                                                           | 19.37                                                     | 0.04                                                                       | 14.67                                                      | 1752.87                                                                                                                                                          | 0.76                                                                                  | 0.18                                                                                                              | 0.11                  | 0.11                    | 19.37                                   |
| 19 | 04-AWS_GCS_CD                                                    | 339.56                                                           | 72.69                                                          | 3.12                                                      | 0.01                                                                       | 9.44                                                       | 1147.35                                                                                                                                                          | 0.76                                                                                  | 0.18                                                                                                              | 0.06                  | 0.06                    | 3.12                                    |
| 20 | 05-AWS_GCS_CD                                                    | 381.78                                                           | 83.25                                                          | 10.70                                                     | 0.02                                                                       | 10.81                                                      | 1308.55                                                                                                                                                          | 0.76                                                                                  | 0.18                                                                                                              | 0.08                  | 0.08                    | 10.70                                   |
| 21 | 06-AWS_GCS_CD                                                    | 809.83                                                           | 436.06                                                         | 0.00                                                      | 0.01                                                                       | 28.32                                                      | 3514.43                                                                                                                                                          | 0.76                                                                                  | 0.18                                                                                                              | 0.17                  | 0.17                    | 0.00                                    |
| 22 | 07-AWS_GCS_CD                                                    | 238.20                                                           | 131.29                                                         | 5.63                                                      | 0.02                                                                       | 8.53                                                       | 1040.57                                                                                                                                                          | 0.76                                                                                  | 0.18                                                                                                              | 0.06                  | 0.06                    | 5.63                                    |
| 23 | 08-AWS_GCS_CD                                                    | 328.50                                                           | 185.44                                                         | 15.90                                                     | 0.04                                                                       | 12.04                                                      | 1463.55                                                                                                                                                          | 0.76                                                                                  | 0.18                                                                                                              | 0.09                  | 0.09                    | 15.90                                   |
| 24 | 09-AWS_GCS_CD                                                    | 203.56                                                           | 228.60                                                         | 3.27                                                      | 0.02                                                                       | 9.90                                                       | 1212.97                                                                                                                                                          | 0.76                                                                                  | 0.18                                                                                                              | 0.07                  | 0.07                    | 3.27                                    |
| 25 | 10-AWS_GCS_CD                                                    | 202.37                                                           | 234.79                                                         | 10.06                                                     | 0.04                                                                       | 10.16                                                      | 1251.04                                                                                                                                                          | 0.76                                                                                  | 0.18                                                                                                              | 0.08                  | 0.08                    | 10.06                                   |
| 26 | 11-AWS_GCS_CD                                                    | 429.45                                                           | 1002.06                                                        | 0.00                                                      | 0.14                                                                       | 32.53                                                      | 4071.52                                                                                                                                                          | 0.76                                                                                  | 0.18                                                                                                              | 0.25                  | 0.25                    | 0.00                                    |
| 27 | 12-AWS_GCS_CD                                                    | 176.57                                                           | 433.67                                                         | 9.29                                                      | 0.07                                                                       | 14.08                                                      | 1747.58                                                                                                                                                          | 0.76                                                                                  | 0.18                                                                                                              | 0.11                  | 0.11                    | 9.29                                    |
| 28 | 13-AWS_GCS_CD                                                    | 152.09                                                           | 394.31                                                         | 16.90                                                     | 0.10                                                                       | 12.80                                                      | 1588.97                                                                                                                                                          | 0.76                                                                                  | 0.18                                                                                                              | 0.12                  | 0.12                    | 16.90                                   |
