# Supplementary material
Source: MDPI journal article supplement (doi:10.3390/cleantechnol8030095)
Supplement: s1 [file Table S2. Reference flow inventory AWS_GCS_CG.pdf › Table S2. Reference flow inventory AWS_GCS_CG.pdf]

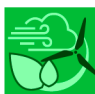

Table S2. Reference flow inventory AWS\_GCS\_CG.

|               | Artificial lightweight aggregates {ES}   production   Cut-off, U | Aggregate washing sludge, treated {ES}   market for   Cut-off, U | Granite cutting sludge, treated {ES}   market for   Cut-off, U | Coffee grounds, post-process {ES}   collection of   Cut-off, U | Tap water (Europe without Switzerland)   market for tap water   Cut-off, U | Electricity, medium voltage {ES}   market for   Cut-off, U | Heat, district or industrial, other than natural gas {Europe without Switzerland}   market for heat, district or industrial, other than natural gas   Cut-off, U | Containerboard, linerboard {RER}   market for containerboard, linerboard   Cut-off, U | Packaging film, low density polyethylene {GLO}   market for packaging film, low density polyethylene   Cut-off, U | Water (emissions air) | Water (emissions water) | Biogenic carbon dioxide (emissions air) |
|---------------|------------------------------------------------------------------|------------------------------------------------------------------|----------------------------------------------------------------|----------------------------------------------------------------|----------------------------------------------------------------------------|------------------------------------------------------------|------------------------------------------------------------------------------------------------------------------------------------------------------------------|---------------------------------------------------------------------------------------|-------------------------------------------------------------------------------------------------------------------|-----------------------|-------------------------|-----------------------------------------|
|               | 1 m <sup>3</sup>                                                 | kg                                                               | kg                                                             | kg                                                             | m <sup>3</sup>                                                             | kWh                                                        | MJ                                                                                                                                                               | kg                                                                                    | kg                                                                                                                | m <sup>3</sup>        | m <sup>3</sup>          | kg                                      |
| 01-AWS_GCS_CG |                                                                  | 865.50                                                           | 0.00                                                           | 0.00                                                           | 0.02                                                                       | 19.67                                                      | 2421.13                                                                                                                                                          | 0.76                                                                                  | 0.18                                                                                                              | 0.14                  | 0.14                    | 0.00                                    |
| 02-AWS_GCS_CG |                                                                  | 423.04                                                           | 0.00                                                           | 6.44                                                           | 0.02                                                                       | 9.76                                                       | 1186.34                                                                                                                                                          | 0.76                                                                                  | 0.18                                                                                                              | 0.07                  | 0.07                    | 6.44                                    |
| 03-AWS_GCS_CG |                                                                  | 515.63                                                           | 0.00                                                           | 15.95                                                          | 0.02                                                                       | 12.08                                                      | 1449.70                                                                                                                                                          | 0.76                                                                                  | 0.18                                                                                                              | 0.09                  | 0.09                    | 15.95                                   |
| 04-AWS_GCS_CG |                                                                  | 366.35                                                           | 78.42                                                          | 3.36                                                           | 0.03                                                                       | 10.18                                                      | 1258.83                                                                                                                                                          | 0.76                                                                                  | 0.18                                                                                                              | 0.08                  | 0.08                    | 3.36                                    |
| 05-AWS_GCS_CG |                                                                  | 299.25                                                           | 65.26                                                          | 8.39                                                           | 0.03                                                                       | 8.47                                                       | 1038.78                                                                                                                                                          | 0.76                                                                                  | 0.18                                                                                                              | 0.07                  | 0.07                    | 8.39                                    |
| 06-AWS_GCS_CG |                                                                  | 705.33                                                           | 379.79                                                         | 0.00                                                           | 0.04                                                                       | 24.66                                                      | 3073.60                                                                                                                                                          | 0.76                                                                                  | 0.18                                                                                                              | 0.17                  | 0.17                    | 0.00                                    |
| 07-AWS_GCS_CG |                                                                  | 248.32                                                           | 136.87                                                         | 5.87                                                           | 0.02                                                                       | 8.89                                                       | 1093.95                                                                                                                                                          | 0.76                                                                                  | 0.18                                                                                                              | 0.06                  | 0.06                    | 5.87                                    |
| 08-AWS_GCS_CG |                                                                  | 314.71                                                           | 177.66                                                         | 15.23                                                          | 0.02                                                                       | 11.54                                                      | 1408.07                                                                                                                                                          | 0.76                                                                                  | 0.18                                                                                                              | 0.08                  | 0.08                    | 15.23                                   |
| 09-AWS_GCS_CG |                                                                  | 229.01                                                           | 257.17                                                         | 3.67                                                           | 0.02                                                                       | 11.13                                                      | 1370.31                                                                                                                                                          | 0.76                                                                                  | 0.18                                                                                                              | 0.08                  | 0.08                    | 3.67                                    |
| 10-AWS_GCS_CG |                                                                  | 181.99                                                           | 211.15                                                         | 9.05                                                           | 0.02                                                                       | 9.14                                                       | 1134.51                                                                                                                                                          | 0.76                                                                                  | 0.18                                                                                                              | 0.07                  | 0.07                    | 9.05                                    |
| 11-AWS_GCS_CG |                                                                  | 418.94                                                           | 977.53                                                         | 0.00                                                           | 0.08                                                                       | 31.74                                                      | 4004.54                                                                                                                                                          | 0.76                                                                                  | 0.18                                                                                                              | 0.21                  | 0.21                    | 0.00                                    |
| 12-AWS_GCS_CG |                                                                  | 169.63                                                           | 416.64                                                         | 8.93                                                           | 0.05                                                                       | 13.53                                                      | 1685.89                                                                                                                                                          | 0.76                                                                                  | 0.18                                                                                                              | 0.10                  | 0.10                    | 8.93                                    |
| 13-AWS_GCS_CG |                                                                  | 142.89                                                           | 370.46                                                         | 15.88                                                          | 0.05                                                                       | 12.03                                                      | 1492.86                                                                                                                                                          | 0.76                                                                                  | 0.18                                                                                                              | 0.09                  | 0.09                    | 15.88                                   |
