# Supplementary material
Source: MDPI journal article supplement (doi:10.3390/cleantechnol8030095)
Supplement: s1 [file Table S3. Reference flow inventory AWS_GCS_OP.pdf › Table S3. Reference flow inventory AWS_GCS_OP.pdf]

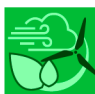

Table S3. Reference flow inventory AWS\_GCS\_OP.

|               | Artificial lightweight aggregates {ES}   production   Cut-off, U | Aggregate washing sludge, treated {ES}   market for   Cut-off, U | Granite cutting sludge, treated {ES}   market for   Cut-off, U | Olive pits, post-process {ES}   collection of   Cut-off, U | Tap water {Europe without Switzerland}   market for tap water   Cut-off, U | Electricity, medium voltage {ES}   market for   Cut-off, U | Heat, district or industrial, other than natural gas {Europe without Switzerland}   market for heat, district or industrial, other than natural gas   Cut-off, U | Containerboard, linerboard {RER}   market for containerboard, linerboard   Cut-off, U | Packaging film, low density polyethylene {GLO}   market for packaging film, low density polyethylene   Cut-off, U | Water (emissions air) | Water (emissions water) | Biogenic carbon dioxide (emissions air) |
|---------------|------------------------------------------------------------------|------------------------------------------------------------------|----------------------------------------------------------------|------------------------------------------------------------|----------------------------------------------------------------------------|------------------------------------------------------------|------------------------------------------------------------------------------------------------------------------------------------------------------------------|---------------------------------------------------------------------------------------|-------------------------------------------------------------------------------------------------------------------|-----------------------|-------------------------|-----------------------------------------|
|               | 1 m <sup>3</sup>                                                 | kg                                                               | kg                                                             | kg                                                         | m <sup>3</sup>                                                             | kWh                                                        | MJ                                                                                                                                                               | kg                                                                                    | kg                                                                                                                | m <sup>3</sup>        | m <sup>3</sup>          | kg                                      |
| 01-AWS_GCS_OP |                                                                  | 847.77                                                           | 0.00                                                           | 0.00                                                       | 0.03                                                                       | 19.27                                                      | 2391.38                                                                                                                                                          | 0.76                                                                                  | 0.18                                                                                                              | 0.14                  | 0.14                    | 0.00                                    |
| 02-AWS_GCS_OP |                                                                  | 445.18                                                           | 0.00                                                           | 6.78                                                       | 0.02                                                                       | 10.27                                                      | 1253.73                                                                                                                                                          | 0.76                                                                                  | 0.18                                                                                                              | 0.07                  | 0.07                    | 6.78                                    |
| 03-AWS_GCS_OP |                                                                  | 554.38                                                           | 0.00                                                           | 17.15                                                      | 0.03                                                                       | 12.99                                                      | 1565.33                                                                                                                                                          | 0.76                                                                                  | 0.18                                                                                                              | 0.10                  | 0.10                    | 17.15                                   |
| 04-AWS_GCS_OP |                                                                  | 364.32                                                           | 77.99                                                          | 3.34                                                       | 0.01                                                                       | 10.13                                                      | 1251.87                                                                                                                                                          | 0.76                                                                                  | 0.18                                                                                                              | 0.07                  | 0.07                    | 3.34                                    |
| 05-AWS_GCS_OP |                                                                  | 355.62                                                           | 77.55                                                          | 9.97                                                       | 0.03                                                                       | 10.07                                                      | 1229.25                                                                                                                                                          | 0.76                                                                                  | 0.18                                                                                                              | 0.07                  | 0.07                    | 9.97                                    |
| 06-AWS_GCS_OP |                                                                  | 844.36                                                           | 454.66                                                         | 0.00                                                       | 0.00                                                                       | 29.52                                                      | 3694.68                                                                                                                                                          | 0.76                                                                                  | 0.18                                                                                                              | 0.18                  | 0.18                    | 0.00                                    |
| 07-AWS_GCS_OP |                                                                  | 239.18                                                           | 131.83                                                         | 5.65                                                       | 0.01                                                                       | 8.56                                                       | 1058.08                                                                                                                                                          | 0.76                                                                                  | 0.18                                                                                                              | 0.06                  | 0.06                    | 5.65                                    |
| 08-AWS_GCS_OP |                                                                  | 293.49                                                           | 165.68                                                         | 14.20                                                      | 0.03                                                                       | 10.76                                                      | 1318.64                                                                                                                                                          | 0.76                                                                                  | 0.18                                                                                                              | 0.08                  | 0.08                    | 14.20                                   |
| 09-AWS_GCS_OP |                                                                  | 232.62                                                           | 261.23                                                         | 3.73                                                       | 0.01                                                                       | 11.31                                                      | 1403.59                                                                                                                                                          | 0.76                                                                                  | 0.18                                                                                                              | 0.07                  | 0.07                    | 3.73                                    |
| 10-AWS_GCS_OP |                                                                  | 181.00                                                           | 210.00                                                         | 9.00                                                       | 0.02                                                                       | 9.09                                                       | 1128.34                                                                                                                                                          | 0.76                                                                                  | 0.18                                                                                                              | 0.06                  | 0.06                    | 9.00                                    |
| 11-AWS_GCS_OP |                                                                  | 424.96                                                           | 991.58                                                         | 0.00                                                       | 0.07                                                                       | 32.19                                                      | 4062.09                                                                                                                                                          | 0.76                                                                                  | 0.18                                                                                                              | 0.21                  | 0.21                    | 0.00                                    |
| 12-AWS_GCS_OP |                                                                  | 117.99                                                           | 289.80                                                         | 6.21                                                       | 0.03                                                                       | 9.41                                                       | 1192.06                                                                                                                                                          | 0.76                                                                                  | 0.18                                                                                                              | 0.07                  | 0.07                    | 6.21                                    |
| 13-AWS_GCS_OP |                                                                  | 128.87                                                           | 334.10                                                         | 14.32                                                      | 0.04                                                                       | 10.85                                                      | 1357.51                                                                                                                                                          | 0.76                                                                                  | 0.18                                                                                                              | 0.08                  | 0.08                    | 14.32                                   |
