# Supplementary material
Source: MDPI journal article supplement (doi:10.3390/cleantechnol8030095)
Supplement: s1 [file Table S4. Reference flow inventory AWS_SCS_CD.pdf › Table S4. Reference flow inventory AWS_SCS_CD.pdf]

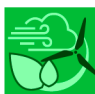

Table S4. Reference flow inventory AWS\_SCS\_CD.

1  
2

|               | Artificial lightweight aggregates {ES}   production   Cut-off, U | Aggregate washing sludge, treated {ES}   market for   Cut-off, U | Slate cutting sludge, treated {ES}   market for   Cut-off, U | Cork dust, post-process {ES}   collection of   Cut-off, U | Tap water {Europe without Switzerland}   market for tap water   Cut-off, U | Electricity, medium voltage {ES}   market for   Cut-off, U | Heat, district or industrial, other than natural gas {Europe without Switzerland}   market for heat, district or industrial, other than natural gas   Cut-off, U | Containerboard, linerboard {RER}   market for containerboard, linerboard   Cut-off, U | Packaging film, low density polyethylene {GLO}   market for packaging film, low density polyethylene   Cut-off, U | Water (emissions air) | Water (emissions water) | Biogenic carbon dioxide (emissions air) |
|---------------|------------------------------------------------------------------|------------------------------------------------------------------|--------------------------------------------------------------|-----------------------------------------------------------|----------------------------------------------------------------------------|------------------------------------------------------------|------------------------------------------------------------------------------------------------------------------------------------------------------------------|---------------------------------------------------------------------------------------|-------------------------------------------------------------------------------------------------------------------|-----------------------|-------------------------|-----------------------------------------|
|               | 1 m <sup>3</sup>                                                 | kg                                                               | kg                                                           | kg                                                        | m <sup>3</sup>                                                             | kWh                                                        | MJ                                                                                                                                                               | kg                                                                                    | kg                                                                                                                | m <sup>3</sup>        | m <sup>3</sup>          | kg                                      |
| 01-AWS_SCS_CD |                                                                  | 862.89                                                           | 0.00                                                         | 0.00                                                      | 0.02                                                                       | 19.61                                                      | 2413.84                                                                                                                                                          | 0.76                                                                                  | 0.18                                                                                                              | 0.14                  | 0.14                    | 0.00                                    |
| 02-AWS_SCS_CD |                                                                  | 430.00                                                           | 0.00                                                         | 6.55                                                      | 0.02                                                                       | 9.92                                                       | 1195.64                                                                                                                                                          | 0.76                                                                                  | 0.18                                                                                                              | 0.07                  | 0.07                    | 6.55                                    |
| 03-AWS_SCS_CD |                                                                  | 626.25                                                           | 0.00                                                         | 19.37                                                     | 0.04                                                                       | 14.67                                                      | 1753.16                                                                                                                                                          | 0.76                                                                                  | 0.18                                                                                                              | 0.11                  | 0.11                    | 19.37                                   |
| 04-AWS_SCS_CD |                                                                  | 341.69                                                           | 86.23                                                        | 3.23                                                      | 0.01                                                                       | 9.80                                                       | 1196.00                                                                                                                                                          | 0.76                                                                                  | 0.18                                                                                                              | 0.06                  | 0.06                    | 3.23                                    |
| 05-AWS_SCS_CD |                                                                  | 369.76                                                           | 95.11                                                        | 10.70                                                     | 0.02                                                                       | 10.81                                                      | 1302.53                                                                                                                                                          | 0.76                                                                                  | 0.18                                                                                                              | 0.07                  | 0.07                    | 10.70                                   |
| 06-AWS_SCS_CD |                                                                  | 587.91                                                           | 391.94                                                       | 0.00                                                      | 0.01                                                                       | 22.27                                                      | 2798.35                                                                                                                                                          | 0.76                                                                                  | 0.18                                                                                                              | 0.14                  | 0.14                    | 0.00                                    |
| 07-AWS_SCS_CD |                                                                  | 221.48                                                           | 151.44                                                       | 5.68                                                      | 0.02                                                                       | 8.60                                                       | 1054.67                                                                                                                                                          | 0.76                                                                                  | 0.18                                                                                                              | 0.06                  | 0.06                    | 5.68                                    |
| 08-AWS_SCS_CD |                                                                  | 268.73                                                           | 188.59                                                       | 14.14                                                     | 0.03                                                                       | 10.72                                                      | 1296.79                                                                                                                                                          | 0.76                                                                                  | 0.18                                                                                                              | 0.08                  | 0.08                    | 14.14                                   |
| 09-AWS_SCS_CD |                                                                  | 187.60                                                           | 286.77                                                       | 3.58                                                      | 0.02                                                                       | 10.86                                                      | 1342.62                                                                                                                                                          | 0.76                                                                                  | 0.18                                                                                                              | 0.08                  | 0.08                    | 3.58                                    |
| 10-AWS_SCS_CD |                                                                  | 142.47                                                           | 226.45                                                       | 8.49                                                      | 0.03                                                                       | 8.58                                                       | 1055.78                                                                                                                                                          | 0.76                                                                                  | 0.18                                                                                                              | 0.06                  | 0.06                    | 8.49                                    |
| 11-AWS_SCS_CD |                                                                  | 275.82                                                           | 1103.26                                                      | 0.00                                                      | 0.09                                                                       | 31.34                                                      | 3954.66                                                                                                                                                          | 0.76                                                                                  | 0.18                                                                                                              | 0.23                  | 0.23                    | 0.00                                    |
| 12-AWS_SCS_CD |                                                                  | 82.60                                                            | 357.17                                                       | 6.70                                                      | 0.04                                                                       | 10.15                                                      | 1264.62                                                                                                                                                          | 0.76                                                                                  | 0.18                                                                                                              | 0.08                  | 0.08                    | 6.70                                    |
| 13-AWS_SCS_CD |                                                                  | 76.53                                                            | 360.15                                                       | 13.51                                                     | 0.07                                                                       | 10.23                                                      | 1264.61                                                                                                                                                          | 0.76                                                                                  | 0.18                                                                                                              | 0.10                  | 0.10                    | 13.51                                   |
