# Supplementary material
Source: MDPI journal article supplement (doi:10.3390/cleantechnol8030095)
Supplement: s1 [file Table S5. Reference flow inventory AWS_SCS_CG.pdf › Table S5. Reference flow inventory AWS_SCS_CG.pdf]

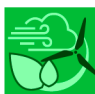

Table S5. Reference flow inventory AWS\_SCS\_CG.

1  
2

|    | Artificial lightweight aggregates {ES}   production   Cut-off, U | Aggregate washing sludge, treated {ES}   market for   Cut-off, U | Slate cutting sludge, treated {ES}   market for   Cut-off, U | Coffee grounds, post-process {ES}   collection of   Cut-off, U | Tap water {Europe without Switzerland}   market for tap water   Cut-off, U | Electricity, medium voltage {ES}   market for   Cut-off, U | Heat, district or industrial, other than natural gas {Europe without Switzerland}   market for heat, district or industrial, other than natural gas   Cut-off, U | Containerboard, linerboard {RER}   market for containerboard, linerboard   Cut-off, U | Packaging film, low density polyethylene {GLO}   market for packaging film, low density polyethylene   Cut-off, U | Water (emissions air) | Water (emissions water) | Biogenic carbon dioxide (emissions air) |
|----|------------------------------------------------------------------|------------------------------------------------------------------|--------------------------------------------------------------|----------------------------------------------------------------|----------------------------------------------------------------------------|------------------------------------------------------------|------------------------------------------------------------------------------------------------------------------------------------------------------------------|---------------------------------------------------------------------------------------|-------------------------------------------------------------------------------------------------------------------|-----------------------|-------------------------|-----------------------------------------|
|    | 1 m <sup>3</sup>                                                 | kg                                                               | kg                                                           | kg                                                             | m <sup>3</sup>                                                             | kWh                                                        | MJ                                                                                                                                                               | kg                                                                                    | kg                                                                                                                | m <sup>3</sup>        | m <sup>3</sup>          | kg                                      |
| 15 | 01-AWS_SCS_CG                                                    | 840.06                                                           | 0.00                                                         | 0.00                                                           | 0.01                                                                       | 19.09                                                      | 2349.97                                                                                                                                                          | 0.76                                                                                  | 0.18                                                                                                              | 0.13                  | 0.13                    | 0.00                                    |
| 16 | 02-AWS_SCS_CG                                                    | 452.79                                                           | 0.00                                                         | 6.90                                                           | 0.01                                                                       | 10.45                                                      | 1269.77                                                                                                                                                          | 0.76                                                                                  | 0.18                                                                                                              | 0.07                  | 0.07                    | 6.90                                    |
| 17 | 03-AWS_SCS_CG                                                    | 507.32                                                           | 0.00                                                         | 15.69                                                          | 0.02                                                                       | 11.89                                                      | 1426.33                                                                                                                                                          | 0.76                                                                                  | 0.18                                                                                                              | 0.09                  | 0.09                    | 15.69                                   |
| 18 | 04-AWS_SCS_CG                                                    | 361.95                                                           | 91.34                                                        | 3.43                                                           | 0.01                                                                       | 10.38                                                      | 1288.32                                                                                                                                                          | 0.76                                                                                  | 0.18                                                                                                              | 0.07                  | 0.07                    | 3.43                                    |
| 19 | 05-AWS_SCS_CG                                                    | 306.85                                                           | 78.93                                                        | 8.88                                                           | 0.01                                                                       | 8.97                                                       | 1094.80                                                                                                                                                          | 0.76                                                                                  | 0.18                                                                                                              | 0.07                  | 0.07                    | 8.88                                    |
| 20 | 06-AWS_SCS_CG                                                    | 581.19                                                           | 387.46                                                       | 0.00                                                           | 0.00                                                                       | 22.01                                                      | 2766.36                                                                                                                                                          | 0.76                                                                                  | 0.18                                                                                                              | 0.14                  | 0.14                    | 0.00                                    |
| 21 | 07-AWS_SCS_CG                                                    | 222.64                                                           | 152.23                                                       | 5.71                                                           | 0.01                                                                       | 8.65                                                       | 1069.09                                                                                                                                                          | 0.76                                                                                  | 0.18                                                                                                              | 0.06                  | 0.06                    | 5.71                                    |
| 21 | 08-AWS_SCS_CG                                                    | 274.10                                                           | 192.35                                                       | 14.43                                                          | 0.03                                                                       | 10.93                                                      | 1333.97                                                                                                                                                          | 0.76                                                                                  | 0.18                                                                                                              | 0.09                  | 0.09                    | 14.43                                   |
| 22 | 09-AWS_SCS_CG                                                    | 205.38                                                           | 313.96                                                       | 3.92                                                           | 0.02                                                                       | 11.89                                                      | 1494.39                                                                                                                                                          | 0.76                                                                                  | 0.18                                                                                                              | 0.08                  | 0.08                    | 3.92                                    |
| 23 | 10-AWS_SCS_CG                                                    | 160.79                                                           | 255.56                                                       | 9.58                                                           | 0.03                                                                       | 9.68                                                       | 1196.50                                                                                                                                                          | 0.76                                                                                  | 0.18                                                                                                              | 0.07                  | 0.07                    | 9.58                                    |
| 24 | 11-AWS_SCS_CG                                                    | 277.22                                                           | 1108.89                                                      | 0.00                                                           | 0.02                                                                       | 31.50                                                      | 3991.06                                                                                                                                                          | 0.76                                                                                  | 0.18                                                                                                              | 0.20                  | 0.20                    | 0.00                                    |
|    | 12-AWS_SCS_CG                                                    | 101.53                                                           | 439.05                                                       | 8.23                                                           | 0.02                                                                       | 12.47                                                      | 1573.78                                                                                                                                                          | 0.76                                                                                  | 0.18                                                                                                              | 0.09                  | 0.09                    | 8.23                                    |
|    | 13-AWS_SCS_CG                                                    | 69.28                                                            | 326.02                                                       | 12.23                                                          | 0.03                                                                       | 9.26                                                       | 1159.09                                                                                                                                                          | 0.76                                                                                  | 0.18                                                                                                              | 0.07                  | 0.07                    | 12.23                                   |
