# Supplementary material
Source: MDPI journal article supplement (doi:10.3390/cleantechnol8030095)
Supplement: s1 [file Table S6. Reference flow inventory AWS_SCS_OP.pdf › Table S6. Reference flow inventory AWS_SCS_OP.pdf]

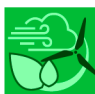

Table S6. Reference flow inventory AWS\_SCS\_OP.

1  
2

| 3<br>4 | Artificial lightweight aggregates {ES}  <br>production   Cut-off, U | Aggregate washing sludge, treated<br>{ES}   market for   Cut-off, U | Slate cutting sludge, treated {ES}  <br>market for   Cut-off, U | Olive pits, post-process {ES}   collec-<br>tion of   Cut-off, U | Tap water {Europe without Switzer-<br>land}   market for tap water   Cut-off,<br>U | Electricity, medium voltage {ES}  <br>market for   Cut-off, U | Heat, district or industrial, other than<br>natural gas {Europe without Switzer-<br>land}   market for heat, district or in-<br>dustrial, other than natural gas   Cut-<br>off, U | Containerboard, linerboard {RER}  <br>market for containerboard, linerboard<br>  Cut-off, U | Packaging film, low density polyeth-<br>ylene {GLO}   market for packaging<br>film, low density polyethylene   Cut-<br>off, U | Water (emissions air) | Water (emissions water) | Biogenic carbon dioxide (emissions<br>air) |
|--------|---------------------------------------------------------------------|---------------------------------------------------------------------|-----------------------------------------------------------------|-----------------------------------------------------------------|------------------------------------------------------------------------------------|---------------------------------------------------------------|-----------------------------------------------------------------------------------------------------------------------------------------------------------------------------------|---------------------------------------------------------------------------------------------|-------------------------------------------------------------------------------------------------------------------------------|-----------------------|-------------------------|--------------------------------------------|
|        | 1 m <sup>3</sup>                                                    | kg                                                                  | kg                                                              | kg                                                              | m <sup>3</sup>                                                                     | kWh                                                           | MJ                                                                                                                                                                                | kg                                                                                          | kg                                                                                                                            | m <sup>3</sup>        | m <sup>3</sup>          | kg                                         |
|        | 01-AWS_SCS_OP                                                       | 856.97                                                              | 0.00                                                            | 0.00                                                            | 0.03                                                                               | 19.48                                                         | 2397.29                                                                                                                                                                           | 0.76                                                                                        | 0.18                                                                                                                          | 0.14                  | 0.14                    | 0.00                                       |
|        | 02-AWS_SCS_OP                                                       | 435.01                                                              | 0.00                                                            | 6.62                                                            | 0.02                                                                               | 10.04                                                         | 1209.58                                                                                                                                                                           | 0.76                                                                                        | 0.18                                                                                                                          | 0.07                  | 0.07                    | 6.62                                       |
|        | 03-AWS_SCS_OP                                                       | 626.15                                                              | 0.00                                                            | 19.37                                                           | 0.04                                                                               | 14.67                                                         | 1752.87                                                                                                                                                                           | 0.76                                                                                        | 0.18                                                                                                                          | 0.11                  | 0.11                    | 19.37                                      |
|        | 04-AWS_SCS_OP                                                       | 339.56                                                              | 72.69                                                           | 3.12                                                            | 0.01                                                                               | 9.44                                                          | 1147.35                                                                                                                                                                           | 0.76                                                                                        | 0.18                                                                                                                          | 0.06                  | 0.06                    | 3.12                                       |
|        | 05-AWS_SCS_OP                                                       | 381.78                                                              | 83.25                                                           | 10.70                                                           | 0.02                                                                               | 10.81                                                         | 1308.55                                                                                                                                                                           | 0.76                                                                                        | 0.18                                                                                                                          | 0.08                  | 0.08                    | 10.70                                      |
|        | 06-AWS_SCS_OP                                                       | 809.83                                                              | 436.06                                                          | 0.00                                                            | 0.01                                                                               | 28.32                                                         | 3514.43                                                                                                                                                                           | 0.76                                                                                        | 0.18                                                                                                                          | 0.17                  | 0.17                    | 0.00                                       |
|        | 07-AWS_SCS_OP                                                       | 238.20                                                              | 131.29                                                          | 5.63                                                            | 0.02                                                                               | 8.53                                                          | 1040.57                                                                                                                                                                           | 0.76                                                                                        | 0.18                                                                                                                          | 0.06                  | 0.06                    | 5.63                                       |
|        | 08-AWS_SCS_OP                                                       | 328.50                                                              | 185.44                                                          | 15.90                                                           | 0.04                                                                               | 12.04                                                         | 1463.55                                                                                                                                                                           | 0.76                                                                                        | 0.18                                                                                                                          | 0.09                  | 0.09                    | 15.90                                      |
|        | 09-AWS_SCS_OP                                                       | 203.56                                                              | 228.60                                                          | 3.27                                                            | 0.02                                                                               | 9.90                                                          | 1212.97                                                                                                                                                                           | 0.76                                                                                        | 0.18                                                                                                                          | 0.07                  | 0.07                    | 3.27                                       |
|        | 10-AWS_SCS_OP                                                       | 202.37                                                              | 234.79                                                          | 10.06                                                           | 0.04                                                                               | 10.16                                                         | 1251.04                                                                                                                                                                           | 0.76                                                                                        | 0.18                                                                                                                          | 0.08                  | 0.08                    | 10.06                                      |
|        | 11-AWS_SCS_OP                                                       | 429.45                                                              | 1002.06                                                         | 0.00                                                            | 0.14                                                                               | 32.53                                                         | 4071.52                                                                                                                                                                           | 0.76                                                                                        | 0.18                                                                                                                          | 0.25                  | 0.25                    | 0.00                                       |
|        | 12-AWS_SCS_OP                                                       | 176.57                                                              | 433.67                                                          | 9.29                                                            | 0.07                                                                               | 14.08                                                         | 1747.58                                                                                                                                                                           | 0.76                                                                                        | 0.18                                                                                                                          | 0.11                  | 0.11                    | 9.29                                       |
|        | 13-AWS_SCS_OP                                                       | 152.09                                                              | 394.31                                                          | 16.90                                                           | 0.10                                                                               | 12.80                                                         | 1588.97                                                                                                                                                                           | 0.76                                                                                        | 0.18                                                                                                                          | 0.12                  | 0.12                    | 16.90                                      |
