# Supplementary material
Source: MDPI journal article supplement (doi:10.3390/cleantechnol8030095)
Supplement: s1 [file Table S7. Inventory of reference flows associated with waste transport..pdf › Table S7. Inventory of reference flows associated with waste transport..pdf]

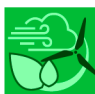

Table S7. Inventory of reference flows associated with waste transport.

|                                                                       | Distance | Granite cutting sludge, post-process {ES}   collection of   Cut-off, U | Slate cutting sludge, post-process {ES}   collection of   Cut-off, U | Aggregate washing sludge, post-process {ES}   collection of   Cut-off, U | Coffee grounds, post-consumer {ES}   collection of   Cut-off, U | Cork dust, post-process {ES}   collection of   Cut-off, U | Olive pits, post-process {ES}   collection of   Cut-off, U | Transport, freight, lorry 16–32 metric ton, euro6 {RER}   market for transport, freight, lorry 16–32 metric ton, EURO6   Cut-off, U |
|-----------------------------------------------------------------------|----------|------------------------------------------------------------------------|----------------------------------------------------------------------|--------------------------------------------------------------------------|-----------------------------------------------------------------|-----------------------------------------------------------|------------------------------------------------------------|-------------------------------------------------------------------------------------------------------------------------------------|
|                                                                       | km       | kg                                                                     | kg                                                                   | kg                                                                       | kg                                                              | kg                                                        | kg                                                         | kgkm                                                                                                                                |
| Granite cutting sludge, treated {ES}   market for   Cut-off, U        | 900      | 1.31                                                                   |                                                                      |                                                                          |                                                                 |                                                           |                                                            | 1176.47                                                                                                                             |
| Slate cutting sludge, treated {ES}   market for   Cut-off, U          | 450      |                                                                        | 1.37                                                                 |                                                                          |                                                                 |                                                           |                                                            | 616.44                                                                                                                              |
| Aggregate washing sludge, treated {ES}   market for   Cut-off, U      | 25       |                                                                        |                                                                      | 1.41                                                                     |                                                                 |                                                           |                                                            | 35.21                                                                                                                               |
| Coffee grounds, treated, post-consumer {ES}   market for   Cut-off, U | 0        |                                                                        |                                                                      |                                                                          | 2.44                                                            |                                                           |                                                            | 0.00                                                                                                                                |
| Cork dust, treated, post-process {ES}   market for   Cut-off, U       | 450      |                                                                        |                                                                      |                                                                          |                                                                 | 1                                                         |                                                            | 450.00                                                                                                                              |
| Olive pits, treated, post-process {ES}   market for   Cut-off, U      | 15       |                                                                        |                                                                      |                                                                          |                                                                 |                                                           | 1                                                          | 15.00                                                                                                                               |
